# Supplementary material for: Characterization of two Austrian porcine reproductive and respiratory syndrome virus (PRRSV) field isolates reveals relationship to East Asian strains
Source: PubMed Central journal article supplement (PMC4709888; doi:10.1186/s13567-015-0293-x), 2016-01-11

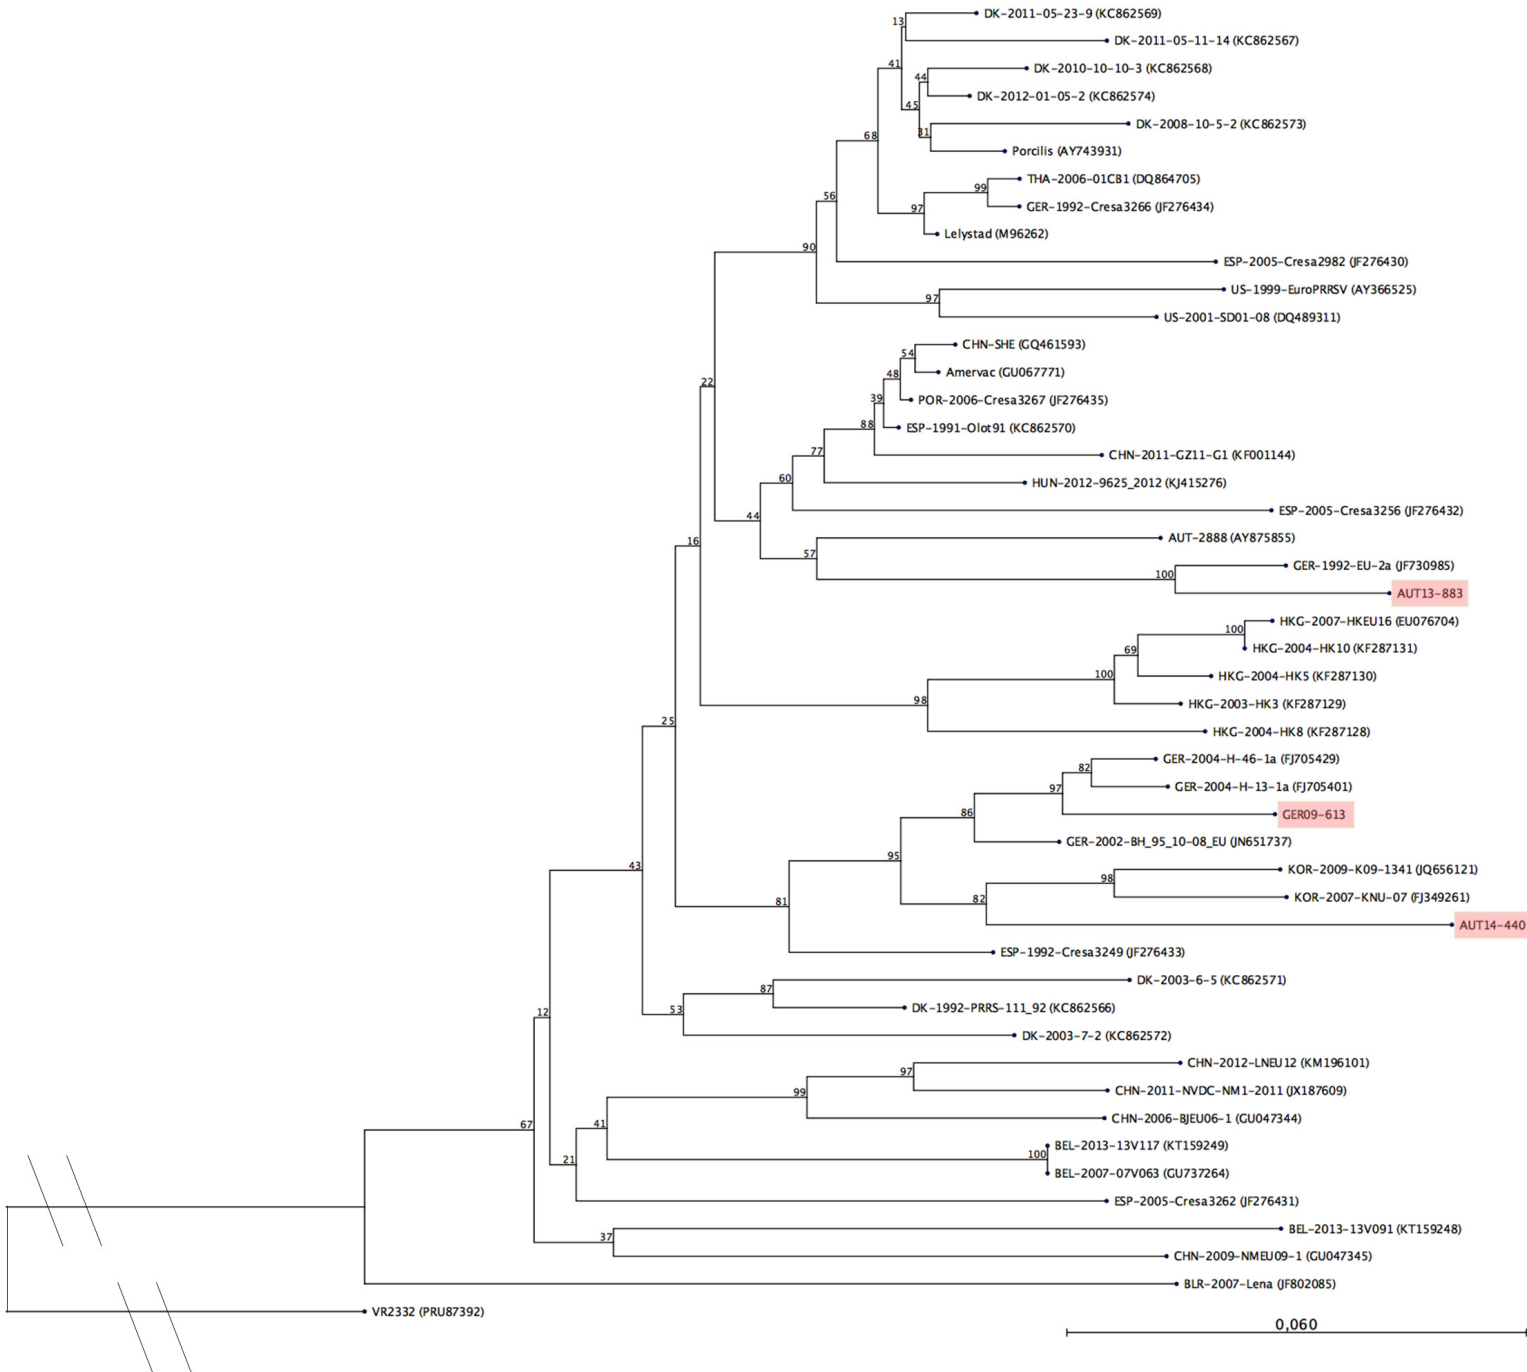

Supplement: 13567_2015_293_MOESM1_ESM.pdf [file 13567_2015_293_MOESM1_ESM.pdf]
